# Supplementary material for: The effect of metformin on ameliorating neurological function deficits and tissue damage in rats following spinal cord injury: A systematic review and network meta-analysis
Source: PubMed Central journal article supplement (PMC9479497; doi:10.3389/fnins.2022.946879), 2022-08-11
Supplement: Data_Sheet_1.pdf [file Data_Sheet_1.pdf]

**The effect of metformin on ameliorating neurological  
function deficits and tissue damage in rats following spinal  
cord injury: A systematic review and network meta-  
analysis**

**SUPPLEMENTARY MATERIAL**

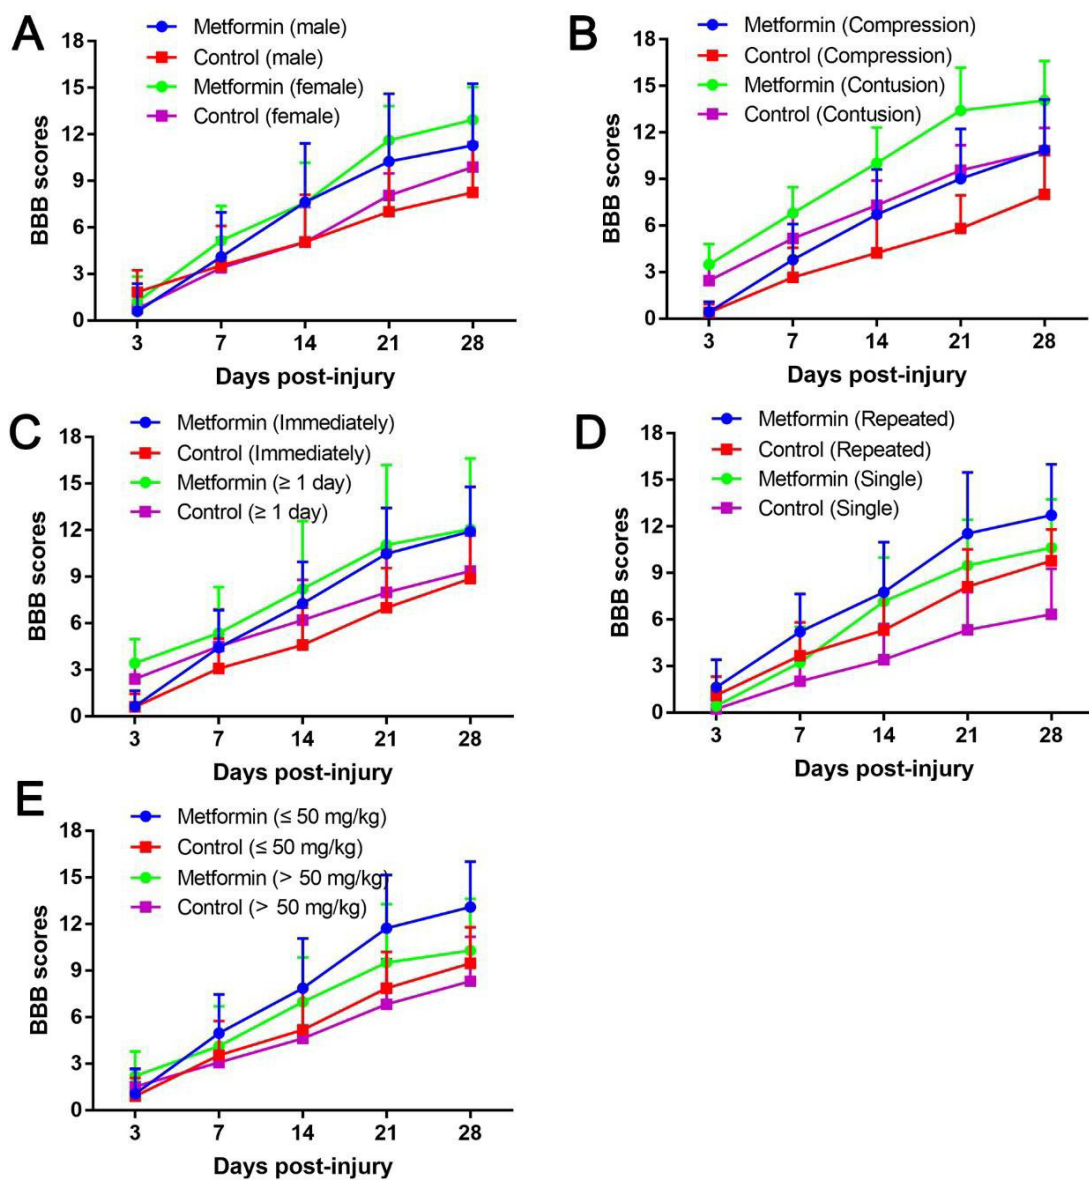

**Fig. S1** The pooled BBB scores of metformin and control groups under the different subgroup classifications. (A-E) BBB scores in each subgroup over time.

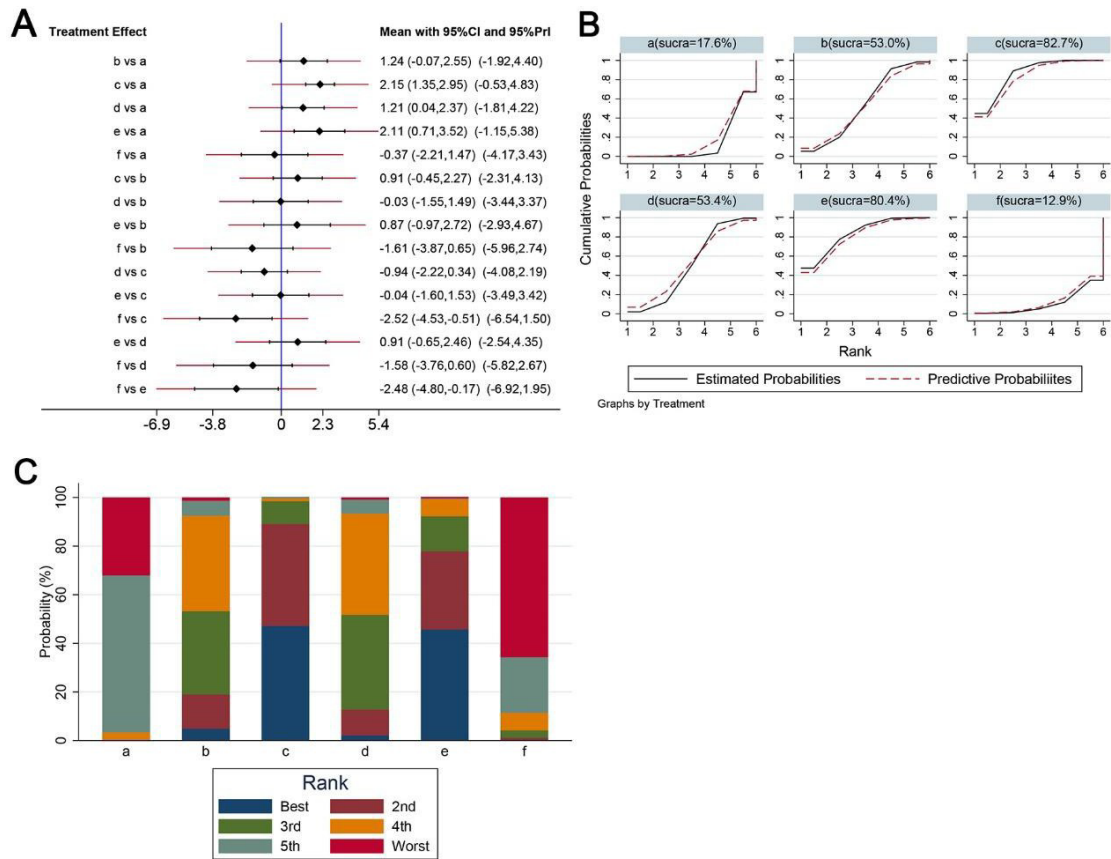

**Fig. S2 Network analysis of the effects of metformin at different doses.** (A) Forest plot of effect size in different metformin doses according to data on 14<sup>th</sup> day. (B) SUCRA value ranking of different administration doses according to data on 14<sup>th</sup> day. (C) histogram of ranking probability of each treatment dose according to data on 14<sup>th</sup> day.

**Table S1. Summary of sensitivity analysis.**

| BBB scale                          | Studies exclusion                  | No. of animals | Weighted mean difference |                   | Heterogeneity         |                |
|------------------------------------|------------------------------------|----------------|--------------------------|-------------------|-----------------------|----------------|
|                                    |                                    |                | 95% CI                   | <i>P</i> value    | <i>I</i> <sup>2</sup> | <i>P</i> value |
| 1 BBB scale at 3 <sup>rd</sup> day | All included                       | 164            | 0.42 [-0.01, 0.85]       | 0.06              | 72                    | 0.0004         |
|                                    | No randomized study                | 66             | 0.81 [0.01, 1.62]        | 0.05              | 74                    | 0.004          |
|                                    | Small sample studies               | 114            | 0.58 [-0.25, 1.42]       | 0.17              | 84                    | 0.0003         |
|                                    | Afshari K et al. 2018              | 136            | 0.47 [-0.05, 0.98]       | 0.07              | 75                    | 0.0002         |
|                                    | Guo Y et al. 2018                  | 154            | 0.36 [-0.07, 0.80]       | 0.10              | 74                    | 0.0004         |
|                                    | Wang C et al. 2016                 | 146            | 0.30 [-0.11, 0.72]       | 0.16              | 69                    | 0.002          |
|                                    | Wang HL et al. 2020 1              | 144            | 0.42 [-0.01, 0.85]       | 0.06              | 72                    | 0.0004         |
|                                    | Wang HL et al. 2020 2              | 164            | 0.42 [-0.01, 0.85]       | 0.06              | 72                    | 0.0004         |
|                                    | Wu YQ et al. 2021                  | 148            | 0.53 [0.09, 0.96]        | 0.02              | 71                    | 0.001          |
|                                    | Zhang D et al. 2017b 1             | 154            | 0.51 [0.02, 0.99]        | 0.04              | 70                    | 0.001          |
|                                    | Zhang D et al. 2017b 2             | 154            | 0.48 [-0.03, 0.98]       | 0.07              | 75                    | 0.0002         |
|                                    | Zhang D et al. 2017c               | 154            | 0.46 [-0.01, 0.93]       | 0.05              | 75                    | 0.0002         |
|                                    | Zhang T et al. 2020                | 152            | 0.25 [-0.12, 0.61]       | 0.19              | 53                    | 0.04           |
|                                    | Zhao JW et al. 2021b               | 154            | 0.39 [-0.07, 0.86]       | 0.09              | 75                    | 0.0002         |
|                                    | 2 BBB scale at 7 <sup>th</sup> day | All included   | 198                      | 1.41 [1.01, 1.80] | < 0.00001             | 52             |
| No randomized study                |                                    | 78             | 1.58 [0.91, 2.25]        | < 0.0001          | 54                    | 0.06           |
| Small sample studies               |                                    | 138            | 1.29 [0.68, 1.89]        | < 0.0001          | 69                    | 0.002          |
| Afshari K et al. 2018              |                                    | 170            | 1.40 [0.98, 1.81]        | < 0.00001         | 55                    | 0.008          |
| Guo WD et al. 2019                 |                                    | 186            | 1.27 [0.92, 1.62]        | < 0.00001         | 38                    | 0.08           |
| Guo Y et al. 2018                  |                                    | 188            | 1.38 [0.98, 1.78]        | < 0.00001         | 54                    | 0.01           |
| Lin CM et al. 2015                 |                                    | 186            | 1.48 [1.20, 1.75]        | < 0.00001         | 0                     | 0.48           |
| Wang C et al. 2016                 |                                    | 180            | 1.41 [0.99, 1.83]        | < 0.00001         | 56                    | 0.007          |
| Wang HL et al. 2020 1              |                                    | 178            | 1.40 [0.98, 1.82]        | < 0.00001         | 55                    | 0.008          |
| Wang HL et al. 2020 2              |                                    | 178            | 1.42 [0.99, 1.85]        | < 0.00001         | 56                    | 0.007          |
| Wang P et al. 2018                 |                                    | 188            | 1.42 [0.98, 1.87]        | < 0.00001         | 55                    | 0.008          |
| Wu YQ et al. 2021                  |                                    | 182            | 1.46 [1.04, 1.88]        | < 0.00001         | 55                    | 0.009          |

|                                     |                        |     |                   |           |    |           |
|-------------------------------------|------------------------|-----|-------------------|-----------|----|-----------|
|                                     | Zhang D et al. 2017b 1 | 188 | 1.39 [0.97, 1.81] | < 0.00001 | 55 | 0.009     |
|                                     | Zhang D et al. 2017b 2 | 188 | 1.40 [0.98, 1.82] | < 0.00001 | 55 | 0.008     |
|                                     | Zhang D et al. 2017c   | 188 | 1.40 [0.99, 1.80] | < 0.00001 | 55 | 0.008     |
|                                     | Zhang T et al. 2020    | 186 | 1.48 [1.04, 1.91] | < 0.00001 | 54 | 0.01      |
|                                     | Zhao JW et al. 2021b   | 188 | 1.40 [0.98, 1.81] | < 0.00001 | 55 | 0.008     |
| 3 BBB scale at 14 <sup>th</sup> day | All included           | 186 | 2.69 [1.92, 3.47] | < 0.00001 | 82 | < 0.00001 |
|                                     | No randomized study    | 66  | 2.87 [1.81, 3.93] | < 0.00001 | 80 | 0.0004    |
|                                     | Small sample studies   | 126 | 2.32 [1.00, 3.64] | 0.0006    | 90 | < 0.00001 |
|                                     | Afshari K et al. 2018  | 158 | 2.58 [1.78, 3.39] | < 0.00001 | 83 | < 0.00001 |
|                                     | Guo Y et al. 2018      | 176 | 2.65 [1.82, 3.47] | < 0.00001 | 84 | < 0.00001 |
|                                     | Lin CM et al. 2015     | 174 | 2.96 [2.37, 3.55] | < 0.00001 | 65 | 0.0009    |
|                                     | Wang C et al. 2016     | 168 | 2.72 [1.88, 3.56] | < 0.00001 | 84 | < 0.00001 |
|                                     | Wang HL et al. 2020 1  | 166 | 2.70 [1.88, 3.53] | < 0.00001 | 84 | < 0.00001 |
|                                     | Wang HL et al. 2020 2  | 166 | 2.78 [1.95, 3.60] | < 0.00001 | 83 | < 0.00001 |
|                                     | Wang P et al. 2018     | 176 | 2.57 [1.76, 3.38] | < 0.00001 | 83 | < 0.00001 |
|                                     | Wu YQ et al. 2021      | 170 | 2.79 [1.97, 3.61] | < 0.00001 | 82 | < 0.00001 |
|                                     | Zhang D et al. 2017b 1 | 176 | 2.72 [1.87, 3.57] | < 0.00001 | 84 | < 0.00001 |
|                                     | Zhang D et al. 2017b 2 | 176 | 2.67 [1.81, 3.52] | < 0.00001 | 84 | < 0.00001 |
|                                     | Zhang D et al. 2017c   | 176 | 2.66 [1.85, 3.47] | < 0.00001 | 84 | < 0.00001 |
|                                     | Zhang T et al. 2020    | 174 | 2.54 [1.79, 3.29] | < 0.00001 | 75 | < 0.00001 |
|                                     | Zhao JW et al. 2021b   | 176 | 2.69 [1.86, 3.52] | < 0.00001 | 84 | < 0.00001 |
| 4 BBB scale at 21 <sup>th</sup> day | All included           | 120 | 3.89 [2.50, 5.28] | < 0.00001 | 91 | < 0.00001 |
|                                     | No randomized study    | 50  | 4.61 [3.21, 6.01] | < 0.00001 | 77 | 0.004     |
|                                     | Small sample studies   | 70  | 3.06 [0.10, 6.03] | 0.04      | 96 | < 0.00001 |
|                                     | Afshari K et al. 2018  | 92  | 3.87 [2.38, 5.35] | < 0.00001 | 93 | < 0.00001 |
|                                     | Guo Y et al. 2018      | 110 | 3.71 [2.22, 5.19] | < 0.00001 | 92 | < 0.00001 |
|                                     | Lin CM et al. 2015     | 108 | 4.43 [3.53, 5.33] | < 0.00001 | 75 | 0.0002    |
|                                     | Wang C et al. 2016     | 102 | 4.02 [2.48, 5.57] | < 0.00001 | 92 | < 0.00001 |
|                                     | Wang P et al. 2018     | 110 | 3.64 [2.14, 5.14] | < 0.00001 | 92 | < 0.00001 |

|                                     |                        |     |                   |           |    |           |
|-------------------------------------|------------------------|-----|-------------------|-----------|----|-----------|
|                                     | Zhang D et al. 2017b 1 | 110 | 3.90 [2.31, 5.49] | < 0.00001 | 93 | < 0.00001 |
|                                     | Zhang D et al. 2017b 2 | 110 | 3.99 [2.40, 5.58] | < 0.00001 | 92 | < 0.00001 |
|                                     | Zhang T et al. 2020    | 108 | 3.67 [2.18, 5.15] | < 0.00001 | 90 | < 0.00001 |
|                                     | Zhao JW et al. 2021b   | 110 | 3.81 [2.30, 5.32] | < 0.00001 | 93 | < 0.00001 |
| 5 BBB scale at 28 <sup>th</sup> day | All included           | 136 | 3.48 [2.04, 4.92] | < 0.00001 | 94 | < 0.00001 |
|                                     | No randomized study    | 66  | 3.71 [2.20, 5.22] | < 0.00001 | 90 | < 0.00001 |
|                                     | Small sample studies   | 86  | 3.11 [0.42, 5.79] | 0.02      | 97 | < 0.00001 |
|                                     | Afshari K et al. 2018  | 108 | 3.35 [1.82, 4.88] | < 0.0001  | 95 | < 0.00001 |
|                                     | Guo Y et al. 2018      | 126 | 3.40 [1.86, 4.94] | < 0.0001  | 95 | < 0.00001 |
|                                     | Lin CM et al. 2015     | 124 | 3.93 [2.95, 4.90] | < 0.00001 | 83 | < 0.00001 |
|                                     | Wang C et al. 2016     | 118 | 3.58 [1.99, 5.17] | < 0.0001  | 94 | < 0.00001 |
|                                     | Wang P et al. 2018     | 126 | 3.28 [1.71, 4.85] | < 0.0001  | 95 | < 0.00001 |
|                                     | Wu YQ et al. 2021      | 120 | 3.55 [1.98, 5.12] | < 0.0001  | 95 | < 0.00001 |
|                                     | Zhang D et al. 2017b 1 | 126 | 3.47 [1.88, 5.05] | < 0.0001  | 95 | < 0.00001 |
|                                     | Zhang D et al. 2017b 2 | 126 | 3.51 [1.91, 5.11] | < 0.0001  | 95 | < 0.00001 |
|                                     | Zhang T et al. 2020    | 124 | 3.20 [1.93, 4.47] | < 0.00001 | 87 | < 0.00001 |
|                                     | Zhao JW et al. 2021b   | 126 | 3.54 [1.93, 5.15] | < 0.0001  | 94 | < 0.00001 |
